# Supplementary material for: The association of polymorphisms in lncRNA-H19 with hepatocellular cancer risk and prognosis
Source: PubMed Central journal article supplement (PMC6123070; doi:10.1042/bsr20171652), 2018-09-05
Supplement: bsr20171652_Supp1.pdf [file bsr20171652_Supp1.pdf]

# The Association of Polymorphisms in lncRNA-*H19* with Hepatocellular Cancer Risk and Prognosis

Ming-li Yang<sup>1</sup>, Zhe Huang<sup>2</sup>, Qian Wang<sup>1</sup>, Huan-huan Chen<sup>1</sup>, Sai-nan Ma<sup>1</sup>, Rong Wu<sup>1</sup>, Wei-song Cai<sup>1,\*</sup>

<sup>1</sup> The 2nd Oncology Department of Affiliated Shengjing Hospital of China Medical University, Shenyang 110022, China

<sup>2</sup> Genery Surgery Department of Affiliated Shengjing Hospital of China Medical University, Shenyang 110015, China

**\*Corresponding author:** Dr. Wei-song Cai, the 2nd Oncology Department of Affiliated Shengjing Hospital of China Medical University, Huaxiang Road 39#, Tiexi District, Shenyang 110022, China. Telephone : +86-024-96615-63215. Email : [cailab9@hotmail.com](mailto:cailab9@hotmail.com).

The contents:

Supplementary Table S1. The primier information for the *H19* polymorphisms

Supplementary Table S2, The baseline of the subjects

Supplementary Table S3, HCC patient clinical features and univariate analysis of overall survival

Supplementary Figure S1. The LD figure of the *H19* genetic polymorphisms

Supplementary Material. The results of the haploview software for the selection of the *H19* genetic polymorphisms



Supplementary Table S1. The primer information for the H19 polymorphisms

| <b>ID</b> | <b>Primer_AlleleFAM</b>     | <b>Primer_AlleleHEX</b>    | <b>Primer_Common</b>      | <b>AlleleFAM</b> | <b>AlleleHEX</b> |
|-----------|-----------------------------|----------------------------|---------------------------|------------------|------------------|
| rs2735971 | CCGATTCCACAACCTACAACCAATTCT | CGATTCCACAACCTACAACCAATTCC | CTTCAGTCTCACCGCCCGGAT     | A                | G                |
| rs2839698 | AGTGAGGAGTGTGGAGTAGGC       | CAGTGAGGAGTGTGGAGTAGGT     | GATGTCGCCCTGTCTGCACGAT    | C                | T                |
| rs3024270 | CCACCATCTCACTGCCCG          | CCACCATCTCACTGCCCG         | CACCAGCCTAAGGTGTTCTGTAGAA | G                | C                |

Supplementary Table S2, The baseline of the subjects

| Variables | Hepatocellular cancer patients (%)<br>n=472 | Controls (%)<br>n=472 | <i>P</i>         |
|-----------|---------------------------------------------|-----------------------|------------------|
| Gender    |                                             |                       | 0.805            |
| Male      | 382(80.9)                                   | 379(80.3)             |                  |
| Female    | 90(17.3 )                                   | 93(19.7)              |                  |
| Age       |                                             |                       | 0.821            |
| Mean±SD   | 56.6±10.8                                   | 56.7±7.2              |                  |
| Median    | 57                                          | 56                    |                  |
| Range     | 21-90                                       | 26-85                 |                  |
| Smoking   |                                             |                       | <b>&lt;0.001</b> |
| Never     | 224(73.9)                                   | 199(60.7)             |                  |
| Ever      | 79(26.1)                                    | 129(39.3)             |                  |
| Drinking  |                                             |                       | <b>&lt;0.001</b> |
| Never     | 256(84.8)                                   | 235(71.9)             |                  |
| Ever      | 46(15.2)                                    | 92(28.1)              |                  |
| HBsAg     |                                             |                       |                  |
| Negative  | 38(15.0)                                    | ND                    |                  |
| Positive  | 216(85.0)                                   | ND                    |                  |
| Anti-HCV  |                                             |                       |                  |
| Negative  | 111(86.0)                                   | ND                    |                  |
| Positive  | 18(14.0)                                    | ND                    |                  |

ND, not known.

Supplementary Table S3, HCC patient clinical features and univariate analysis of overall survival

| Factors        | All HCC<br>n(%) | Death,<br>n | MST <sup>a</sup><br>(M) | <i>P</i> -value |
|----------------|-----------------|-------------|-------------------------|-----------------|
| Grade          | n=130           | n=43        |                         |                 |
| High           | 31(23.8%)       | 5(11.6%)    | 50.7 <sup>b</sup>       | 0.170           |
| Moderate       | 73(56.2%)       | 28(65.1%)   | 48.000                  |                 |
| Low            | 26(20.0%)       | 10(23.3%)   | 45.000                  |                 |
| Smoking        | n=205           | n=71        |                         |                 |
| Never Smoker   | 172(83.9%)      | 60(84.5%)   | 69.000                  | 0.380           |
| Ever Smoker    | 33(16.1%)       | 11(15.4%)   | 98.9 <sup>b</sup>       |                 |
| Drinking       | n=205           | n=71        |                         |                 |
| Nondrinker     | 186(90.7%)      | 66(93.0%)   | 90.000                  | 0.383           |
| Drinker        | 19(9.3%)        | 5(7.0%)     | 87.0 <sup>b</sup>       |                 |
| Family history | n=309           | n=123       |                         |                 |
| No             | 252(81.6%)      | 106(86.2%)  | 51.000                  | 0.123           |
| Yes            | 57(18.4%)       | 17(13.8%)   | 95.6 <sup>b</sup>       |                 |
| HBV            | n=168           | n=58        |                         |                 |
| No             | 30(17.9%)       | 11(19.0%)   | 27.000                  | 0.102           |
| Yes            | 138(82.1%)      | 47(81.0%)   | 86.5 <sup>b</sup>       |                 |
| HCV            | n=118           | n=51        |                         |                 |
| No             | 102(86.4%)      | 44(86.3%)   | 28.000                  | 0.984           |
| Yes            | 16(13.6%)       | 7(13.7%)    | 27.000                  |                 |

<sup>a</sup>, MST, median survival time (months). <sup>b</sup>, mean survival time was provided when MST could not be calculated.

Supplementary Figure S1. The LD figure of the *H19* genetic polymorphisms

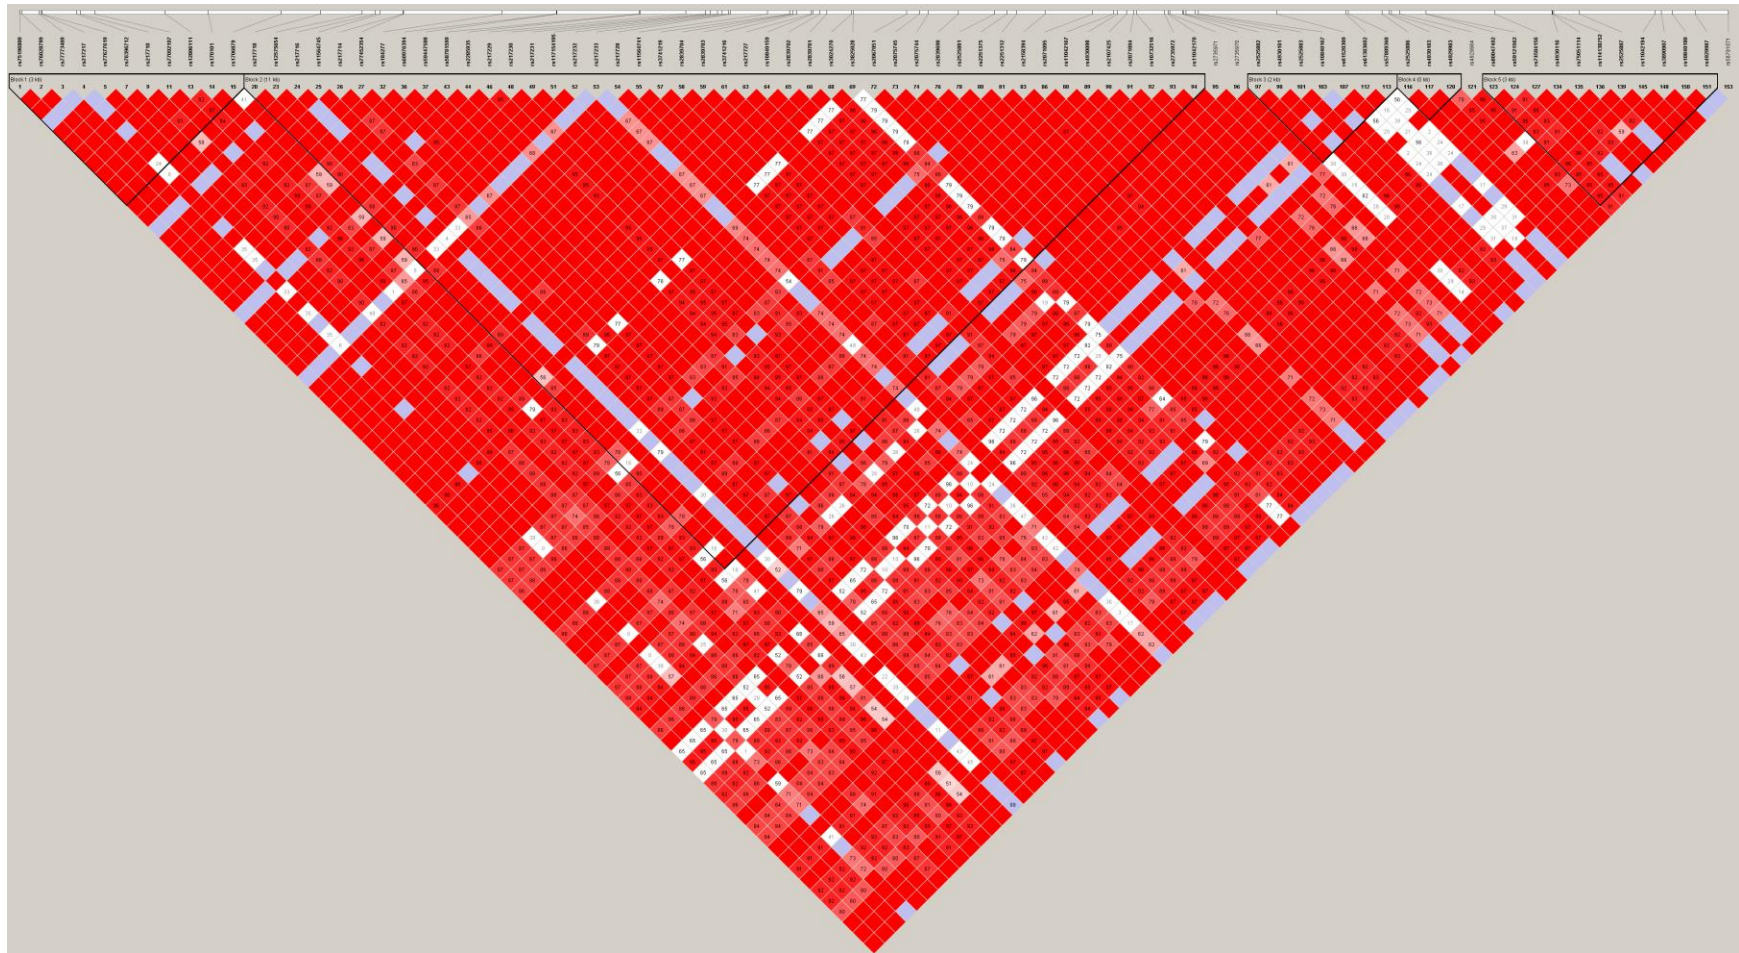

Figure legend. The studied polymorphisms of *lncRNA-H19* were selected the HapMap data. TagSNPs were selected by Tagger via Haploview with the following criteria: pairwise tagging of HapMap population with  $r^2 \geq 0.8$ ; a minor allele frequency (MAF)  $\geq 5\%$ ; and Chinese Han Beijing (CHB) ethnicity. And we expanded 10kbp both upstream and downstream of *H19*. Then, the LD figure of the *H19* genetic polymorphisms was shown.

Supplementary Material. The results of the haploview software for the selection of the *H19* genetic polymorphisms.

captured 81 of 81 alleles at  $r^2 \geq 0.8$

captured 100 percent of alleles with mean  $r^2$  of 0.956

using 17 Tag SNPs in 17 tests.

| Allele      | Best Test  | $r^2$ w/test |
|-------------|------------|--------------|
| rs75196800  | rs75196800 | 1.0          |
| rs76028799  | rs75196800 | 1.0          |
| rs77773409  | rs75196800 | 1.0          |
| rs217217    | rs217217   | 1.0          |
| rs77677619  | rs75196800 | 1.0          |
| rs76396712  | rs75196800 | 1.0          |
| rs217710    | rs217710   | 1.0          |
| rs77092197  | rs75196800 | 1.0          |
| rs12806111  | rs2525883  | 0.878        |
| rs170101    | rs4930101  | 0.858        |
| rs1706879   | rs1706879  | 1.0          |
| rs217718    | rs217718   | 1.0          |
| rs12575654  | rs2525883  | 0.9          |
| rs217716    | rs217716   | 1.0          |
| rs11564745  | rs2525883  | 0.9          |
| rs217714    | rs4930101  | 0.858        |
| rs77452354  | rs75196800 | 1.0          |
| rs184277    | rs4930101  | 0.925        |
| rs60976394  | rs217231   | 1.0          |
| rs59447588  | rs217231   | 1.0          |
| rs58781599  | rs75196800 | 0.962        |
| rs2285935   | rs4930101  | 0.9          |
| rs217229    | rs217231   | 0.981        |
| rs217230    | rs4930101  | 0.925        |
| rs217231    | rs217231   | 1.0          |
| rs117154195 | rs75196800 | 0.962        |
| rs217232    | rs217231   | 1.0          |
| rs217233    | rs217233   | 1.0          |
| rs217728    | rs2525883  | 0.939        |

|            |            |       |
|------------|------------|-------|
| rs11564741 | rs75196800 | 0.962 |
| rs3741219  | rs4930101  | 0.925 |
| rs2839704  | rs4930101  | 0.925 |
| rs2839703  | rs4930101  | 0.925 |
| rs3741216  | rs75196800 | 0.962 |
| rs217727   | rs2525883  | 0.939 |
| rs10840159 | rs4930101  | 0.925 |
| rs2839702  | rs4930101  | 0.925 |
| rs2839701  | rs4930101  | 0.925 |
| rs3024270  | rs217710   | 0.864 |
| rs3825028  | rs75196800 | 0.89  |
| rs2067051  | rs4930101  | 0.95  |
| rs2075745  | rs4930101  | 1.0   |
| rs2075744  | rs4930101  | 1.0   |
| rs2839698  | rs4930101  | 1.0   |
| rs2525881  | rs4930101  | 1.0   |
| rs2251375  | rs2525883  | 0.8   |
| rs2251312  | rs2735971  | 1.0   |
| rs2158394  | rs2525883  | 0.979 |
| rs2071095  | rs4930101  | 1.0   |
| rs11042167 | rs4930101  | 1.0   |
| rs4930098  | rs4930101  | 1.0   |
| rs2107425  | rs2525883  | 0.816 |
| rs2071094  | rs4930101  | 1.0   |
| rs10732516 | rs4930101  | 1.0   |
| rs2735972  | rs2735971  | 1.0   |
| rs11042170 | rs4930101  | 1.0   |
| rs2735971  | rs2735971  | 1.0   |
| rs2735970  | rs2525883  | 0.816 |
| rs2525882  | rs2525882  | 1.0   |
| rs4930101  | rs4930101  | 1.0   |
| rs2525883  | rs2525883  | 1.0   |
| rs10840167 | rs4930101  | 1.0   |
| rs61520309 | rs57889360 | 1.0   |
| rs61383602 | rs61383602 | 1.0   |
| rs57889360 | rs57889360 | 1.0   |
| rs2525886  | rs2525886  | 1.0   |



|             |            |       |
|-------------|------------|-------|
| rs4930103   | rs2525887  | 1.0   |
| rs4929983   | rs2525887  | 0.852 |
| rs4929984   | rs4930101  | 0.823 |
| rs80047492  | rs2525887  | 0.961 |
| rs59121562  | rs2525887  | 0.961 |
| rs74584156  | rs75196800 | 0.888 |
| rs4930110   | rs4930101  | 1.0   |
| rs75051114  | rs75051114 | 1.0   |
| rs114138752 | rs75196800 | 0.888 |
| rs2525887   | rs2525887  | 1.0   |
| rs11042194  | rs2525887  | 0.961 |
| rs3890907   | rs2525887  | 0.801 |
| rs10840180  | rs4930101  | 0.95  |
| rs4929987   | rs4930101  | 0.95  |
| rs56781071  | rs75196800 | 0.852 |

Test Alleles Captured

**rs2839698:**

rs2067051,rs4930098,rs2075744,rs2071095,rs170101,rs184277,rs2839702,rs2525881,rs4930101,rs10840167,rs2839704,rs4929984,rs10840180,rs3741219,rs10840159,rs4929987,rs2285935,rs2839701,rs11042167,rs2071094,rs2839703,rs2075745,rs10732516,rs4930110,rs217230,rs217714,rs11042170  
rs75196800:

rs77452354,rs75196800,rs77773409,rs117154195,rs76396712,rs114138752,rs77092197,rs58781599,rs74584156,rs11564741,rs56781071,rs3741216,rs77677619,rs3825028,rs76028799

rs2525883:

rs11564745,rs2107425,rs2251375,rs12575654,rs217727,rs217728,rs2735970,rs2525883,rs12806111,rs2158394

rs2525887: rs11042194,rs59121562,rs2525887,rs3890907,rs4930103,rs80047492,rs4929983

rs217231: rs217231,rs59447588,rs217232,rs217229,rs60976394

**rs2735971:** rs2251312,rs2735972,rs2735971

**rs3024270:** rs217710,rs3024270

rs57889360: rs57889360,rs61520309

rs2525882 rs2525882

rs217716 rs217716

rs2525886 rs2525886

rs217233 rs217233

rs217217 rs217217

rs1706879      rs1706879  
rs217718        rs217718  
rs75051114     rs75051114  
rs61383602     rs61383602

Then, we referred a published literature and took the intersection as the considering promising aiming SNPs. Ultimately, there were 3 SNPs covering lncRNA-H19 gene selected to proceed our study which were rs2839698 (G>A), rs2839698 (C>T), rs3024270 (G>C).
